# Attentional bias to threat and gray matter volume morphology in high anxious individuals

Joshua M. Carlson and Lin Fang

Department of Psychological Science, Northern Michigan University, Marquette, MI, USA

Correspondence should be addressed to:

Joshua M. Carlson, Ph.D.  
Department of Psychological Science  
Northern Michigan University  
1401 Presque Isle Avenue  
Marquette, MI 49855  
[joshcarl@nmu.edu](mailto:joshcarl@nmu.edu)

## Abstract

In a sample of highly anxious individuals, the relationship between gray matter volume brain morphology and attentional bias to threat was assessed. Participants performed a dot-probe task of attentional bias to threat and gray matter volume was acquired from whole brain structural T<sub>1</sub>-weighted MRI scans. The results replicate previous findings in unselected samples that elevated attentional bias to threat is linked to greater gray matter volume in the anterior cingulate cortex, middle frontal gyrus, and striatum. In addition, we provide novel evidence that elevated attentional bias to threat is associated with greater gray matter volume in the right posterior parietal cortex, cerebellum, and other distributed regions. Lastly, exploratory analyses provide initial evidence that distinct sub-regions of the right posterior parietal cortex may contribute to attentional bias in a sex-specific manner. Our results illuminate how differences in gray matter volume morphology relate to attentional bias to threat in anxious individuals. This knowledge could inform neurocognitive models of anxiety-related attentional bias to threat and targets of neuroplasticity in anxiety interventions such as attention bias modification.

**Keywords:** attention bias; anxiety; gray matter; structural MRI; anterior cingulate; cerebellum; parietal cortex; prefrontal cortex

## Introduction

The human brain is consistently inundated by a multitude of competing sensory inputs, especially within the visual domain. Due to a limited processing capacity, the brain cannot process all sensory input equally and has developed mechanisms by which certain inputs are prioritized for more elaborative processing at the expense of non-prioritized inputs (Desimone & Duncan, 1995). One class of stimuli that are thought to receive prioritized processing are those stimuli that hold biological or emotional significance (Vuilleumier, 2005). This is especially true for emotionally negative or threat-related stimuli that signal the presence of danger (Ohman, Flykt, & Esteves, 2001). The prioritized processing of threat-related stimuli is referred to as a threat bias and the preferential allocation of attentional resources to threatening stimuli is referred to as an attentional bias to threat. This attentional bias to threat appears to occur automatically in the absence of conscious awareness (Carlson & Mujica-Parodi, 2015; Carlson & Reinke, 2008; Fox, 2002; Mogg & Bradley, 2002). Although an attentional bias to threat is adaptive, elevated attentional bias to threat is associated with elevated anxiety (Bar-Haim, Lamy, Pergamin, Bakermans-Kranenburg, & van Ijzendoorn, 2007) and genetic risk for anxiety (Beevers, Gibb, McGeary, & Miller, 2007; Carlson, Mujica-Parodi, Harmon-Jones, & Hajcak, 2012; Fox, Ridgewell, & Ashwin, 2009).

Given the adaptive and maladaptive significance of attentional bias to threat, its underlying neural mechanisms have been extensively studied. Evidence from human lesion and neuroimaging studies indicate that the amygdala plays a critical role in the modulation of spatial attention by threatening stimuli (Anderson & Phelps, 2001; Bach, Hurlmann, & Dolan, 2014; Fu, Taber-Thomas, & Perez-Edgar, 2015; Monk et al., 2008); in part by communicating

with visual cortex to prioritize threat-related stimuli (Adolphs, 2004; Amaral & Price, 1984; Carlson, Reinke, & Habib, 2009; Vuilleumier, Richardson, Armony, Driver, & Dolan, 2004). The structural and functional connectivity between the amygdala and areas of the prefrontal cortex (PFC)—such as the anterior cingulate cortex (ACC)—is linked to individual differences in attentional bias to threat such that greater connectivity is associated with elevated attentional bias to threat (Carlson, Cha, Harmon-Jones, Mujica-Parodi, & Hajcak, 2014; Carlson, Cha, & Mujica-Parodi, 2013). The ACC and other PFC regions are also engaged in task-based studies of attentional bias to threat (Armony & Dolan, 2002; Bush, Luu, & Posner, 2000; Fu et al., 2015; Price et al., 2014; White et al., 2016). In addition, greater gray matter volume (GMV) in the basal forebrain/striatum, ACC, and other PFC regions is linked to increased attentional bias to threat (Carlson, Beacher, et al., 2012).

Although research into the neural mechanisms of attentional bias to threat is abundant, the functional significance of individual differences in brain structure has been understudied. To the best of our knowledge, only a single study has explored the relationship between GMV and attentional bias to threat in an unselected sample (Carlson, Beacher, et al., 2012). No studies have explored this relationship in high anxiety individuals—despite the fact that attentional bias to threat is critical in cognitive models of anxiety (Mathews & Mackintosh, 1998) and plays a causal role in the development of anxiety (MacLeod, Rutherford, Campbell, Ebsworthy, & Holker, 2002). Moreover, the efficacy of interventions for anxiety, such as attention bias modification (ABM), are more effectively assessed by tracking changes in brain structure and function following training (Abend et al., 2019; Aday & Carlson, 2017; Britton et al., 2015; Browning, Holmes, Murphy, Goodwin, & Harmer, 2010; Hilland et al., 2020; Hilland, Landro,

Harmer, Maglanoc, & Jonassen, 2018; Taylor et al., 2014). Therefore, identifying the neural mechanisms underlying attentional bias to threat will also be important for tracking the neuroplastic effects of ABM and other anxiety interventions.

This study aimed to assess the relationship between brain structure and attention bias behavior in a sample of highly anxious individuals. To this end, participants performed a dot-probe task of attentional bias to threat in a laboratory setting outside the MRI environment. Both traditional attention bias scores and newer trial level bias score measures (Zvielli, Bernstein, & Koster, 2015) from the dot-probe task were utilized. Given the association between elevated anxiety and attentional bias to threat discussed above, participants were selected for heightened levels of attentional bias to threat and anxiety. During a separate testing session, whole brain structural T<sub>1</sub>-weighted MRI scans were acquired. Based on previous research (Carlson, Beacher, et al., 2012), we hypothesized that greater attentional bias to threat would be linked to greater GMV in the ACC and other PFC regions.

## Method

### Participants

One-hundred and eleven right-handed adults (female = 75) between 18 and 38 ( $M = 21.90$ ,  $SD = 4.71$ ) years of age participated in the study. Participants provided written informed consent and received monetary compensation for their participation. The study was approved by the Northern Michigan University Institutional Review Board. Participants included in this report were recruited for a clinical trial assessing the effects of attention bias modification on changes in brain structure (NCT03092609). All data included in this manuscript were collected

during the pre-training session. The determination of our sample size was based on the availability of this dataset.

To be included in the study, participants were screened to meet the following criteria (1) right-handed, (2) 18 – 42 years of age, (3) normal (or corrected to normal) vision, (4) no current psychological treatment, (5) no recent history of head injury or loss of consciousness, (6) no current psychoactive medications, (7) not claustrophobic, (8) not pregnant, (9) no metal in the body or other MRI contraindications (10) trait anxiety scores  $\geq 40$  on the STAI-T (see below for questionnaire information), and (11) attentional bias scores  $\geq 7$ ms in the dot-probe task (see below for task details).

### **State-Trait Anxiety Inventory**

State and trait anxiety were measured with the Spielberger State-Trait Anxiety Inventory (STAI; Spielberger, Gorsuch, & Lushene, 1970). The STAI-S consists of 20 items and yields a measure of state anxiety (how anxious one currently feels). The STAI-T also consists of 20 items and yields a measure of trait anxiety (how anxious one generally feels). Participants' STAI-T levels ranged from 40 to 71 ( $M = 51.58$ ,  $SD = 7.31$ ), indicative of a high trait anxious sample.

### **Dot-Probe Task**

The dot-probe task (MacLeod & Mathews, 1988) was programmed using E-Prime2 (Psychology Software Tools, Pittsburg, PA) and displayed on a 60 Hz 16" LCD computer monitor. Stimuli consisted of 20 fearful and neutral grayscale faces of 10 different actors<sup>1</sup> (half female; from Gur et al., 2002; Lundqvist, Flykt, & Öhman, 1998) that were cropped to exclude extraneous features. Ratings from a separate sample ( $N = 85$ ) indicate that the fearful faces

---

<sup>1</sup> Fearful and Neutral face stimuli were from actors: 207, 208, 213, and 217 (Gur et al., 2002) as well as AF14, AF19, AF22, AM10, AM22, AM34 (Lundqvist, Flykt, & Öhman, 1998).

were perceived as more negative ( $M = 3.83$ ,  $SD = .30$ ) than the neutral faces ( $M = 4.45$ ,  $SD = .52$ ),  $t(18) = 3.23$ ,  $p = .005$  (Carlson & Fang, 2020).

Each trial started with a white fixation cue (+) in the center of a black screen for 1000 ms. Two faces were randomly presented simultaneously on the horizontal axis for 100 ms. Participants were seated 59 cm from the screen. Facial stimuli were 5cm × 7cm in size. The target dot appeared at one of the two face locations immediately after the faces disappeared and remained on the screen until a response was made. Responses were recorded with a Chronos E-Prime response box. Participants indicated left-sided targets by pressing the first, leftmost button using their right index finger and indicated right-sided targets by pressing the second button using their right middle finger. Participants were instructed to focus on the central fixation throughout the trial and respond to the target dot as quickly and accurately as possible. The task included five blocks. At the end of each block, participants received feedback about their overall accuracy and reaction times to encourage accurate rapid responses.

The task included congruent trials (dot on the same side as the emotional face), incongruent trials (dot on the same side as the neutral face), and baseline trials (two neutral faces). Faster responses on congruent compared to incongruent trials was considered representative of attentional bias towards the respective emotion. The task consisted of five blocks with 450 trials in total. Each block contained 30 congruent, 30 incongruent, and 30 baseline trials presented in a random order.

### **Behavioral Data Preparation and Processing**

Data were filtered to include correct responses between 150 and 750 ms post-target onset (Torrence, Wylie, & Carlson, 2017). Attention bias scores were calculated as the mean

incongruent – congruent difference in reaction time (in ms). In addition, trial-level bias scores (TLBS) were computed using the steps outlined by Zvielli and colleagues (2015) and Carlson and colleagues (2019). Using these TLBSs, several summary variables were calculated including *Mean<sub>toward</sub>* (Mean of TLBSs > 0 ms; i.e., mean bias towards emotional stimuli), *Mean<sub>away</sub>* (Mean of TLBSs < 0 ms; i.e., mean bias away from emotional stimuli), and variability. TLBS variability was calculated as the summed distance of succeeding TLBS divided by the total number of trial level bias scores. Correlations between attention bias measures can be seen in **Table 1**.

**Table 1.** Correlations between Attention Bias Measures (*N* = 111)

|                  | Attention Bias | TLBS Variability | TLBS Toward | TLBS Away |
|------------------|----------------|------------------|-------------|-----------|
| Attention Bias   | --             | .34**            | .57**       | -.11      |
| TLBS Variability |                | --               | .90**       | -.86**    |
| TLBS Toward      |                |                  | --          | -.70**    |
| TLBS Away        |                |                  |             | --        |

*Note:* TLBS, trial-level bias score. \*\* *p* < .001

## MRI Data Acquisition and Analysis

MRI data were collected with a 1.5 Tesla General Electric whole body scanner<sup>2</sup> within 1-2 weeks following the behavioral session. High-resolution 3D FSPGR T1-weighted images were obtained using the following acquisition parameters: TR/TI = min/450, flip angle = 9°, FOV = 250, matrix = 256 × 256, voxel size = 0.98 × 0.98 mm, slice thickness = 1.2 mm..

We used the automated user-independent voxel-wise measurement approach, known as voxel based morphometry (VBM), to assess the association between regional brain volumes and individual differences in attention bias behavior. The VBM methodology used here is similar to the approach described by Ashburner and Friston (2000). Three-dimensional T<sub>1</sub>-weighted FSPGR MRIs were visually examined for artifacts or abnormalities and manually adjusted to a

<sup>2</sup> MRI data were collected on two identical scanners (scanner 1 *n* = 64 & scanner 2 *n* = 47). A comparison of whole brain GMV (*p* = .86) and ICV (*p* = .55) across scanners indicated no systematic differences in scanning location.



common origin at the anterior commissure. Images were then pre-processed using established VBM methods in SPM12 (<http://www.fil.ion.ucl.ac.uk/spm>). Images were first segmented into gray matter (GM), white matter (WM), and cerebrospinal fluid (CSF) tissue types. Segmented gray matter images were normalized to MNI space and smoothed using an 8mm FWHM Gaussian kernel. Measures of intracranial volume (ICV) were obtained from summed global signal of segmented images of GM, WM, and CSF.

Within SPM12 a multiple regression analysis was run which included participants' (1) Attention Bias, (2) TLBS *Mean<sub>toward</sub>*, (3) TLBS *Mean<sub>away</sub>*, and (4) TLBS Variability scores as predictors of GMV. This regression model also included age and ICV as covariates to control for potential confounding effects on regional gray matter (Ge et al., 2002; Tisserand et al., 2004). We tested for a positive relationship between attention bias measures and GMV. In addition, this model allowed us to compare and contrast different attention bias measures in predicting GMV. An initial whole brain threshold was set to uncorrected  $p < .001$  with a 50 voxel cluster threshold. A family-wise error (FWE) small volume correction (SVC) at  $p < .05$  was applied to the ACC and other regions of interest (ROIs) previously shown to have GMV correlate with attention bias (i.e., MFG, SFG, IFG, and striatum). The SVC was applied using an 18mm sphere centered on the ROI coordinates reported in Carlson et al (2012). Given recent work exploring sex differences in attentional bias to threat at a behavioral level (Campbell & Muncer, 2017; Carlson, Aday, & Rubin, 2019), exploratory analyses assessing sex differences in the neural correlates of attentional bias are included in the **Supplementary Material**.

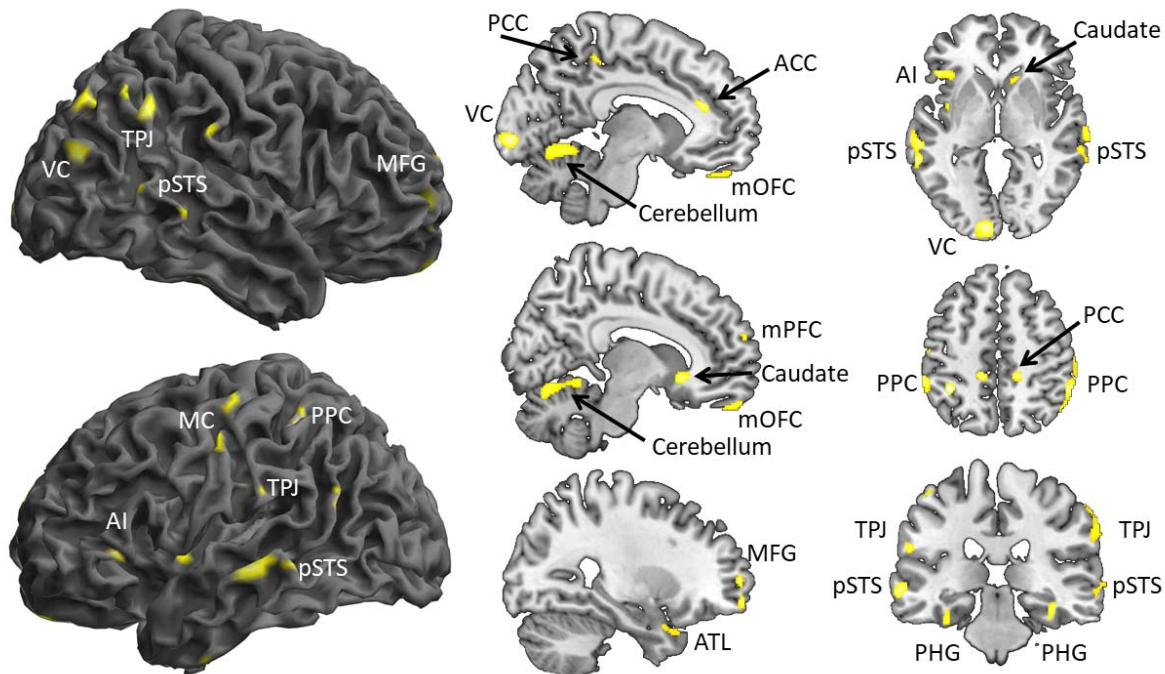

**Figure 1.** Attentional bias to threat correlated with regional gray matter volume (GMV) in the anterior cingulate cortex (ACC), anterior insula (AI), anterior temporal lobe (ATL), caudate, cerebellum, medial orbitofrontal cortex (mOFC), middle frontal gyrus (MFG), motor cortex (MC), parahippocampal gyrus (PHG), posterior cingulate cortex (PCC), posterior parietal cortex (PPC), posterior superior temporal sulcus (pSTS), temporoparietal junction (TPJ), and regions of the visual cortex (VC). Greater GMV was associated with greater attentional bias to threat. Images thresholded at uncorrected  $p < .001$ ,  $k > 50$  voxels.

## Results

Attentional bias to threat was found to positively correlate with GMV in a number of regions using the initial uncorrected threshold (i.e.,  $p < .001$ ,  $k > 50$ ; see **Table 2 & Figure 1**). SVC of ROIs indicated significant associations in the ACC:  $t(104) = 4.02$ ,  $k = 90$ ,  $xyz = -9, 35, 20$ , middle frontal gyrus (MFG):  $t(104) = 3.85$ ,  $k = 73$ ,  $xyz = 29, 59, 5$ , and striatum:  $t(104) = 3.93$ ,  $k = 127$ ,  $xyz = 11, 20, -8$ . Beyond these *a priori* ROIs, whole brain cluster-level FWE associations were observed in the right posterior parietal cortex (rPPC):  $t(104) = 4.11$ ,  $k = 1013$ ,  $xyz = 56, -53, 38$  and bilateral cerebellum:  $t(104) = 4.01$ ,  $k = 943$ ,  $xyz = -6, -59, -9$ . No negative associations between attentional bias to threat and GMV were found. In addition, no significant associations

were observed for TLBS  $Mean_{toward}$ ,  $Mean_{away}$ , or Variability. However, conjunction analysis between attention bias and TLBS Variability revealed overlapping neural correlates (see **Supplementary Table 2**) and a direct comparison of attention bias scores with TLBSs (i.e., attention bias > TLBS) did not result in any significant differences. Finally, results of exploratory analyses of sex differences in the neural correlates of attentional bias to threat can be found in the **Supplementary Materials**.

**Table 2: GMV Correlates of Attentional Bias to Threat**

| Region                            | Hemisphere | MNI Coordinates |     |     | Voxels | Peak<br>t value | Sig. |
|-----------------------------------|------------|-----------------|-----|-----|--------|-----------------|------|
|                                   |            | X               | Y   | Z   |        |                 |      |
| <i>Parietal Cortex</i>            | L          | -56             | -41 | 53  | 155    | 4.05            | *    |
|                                   | L          | -38             | -47 | 50  | 144    | 4.54            | *    |
|                                   | L          | -60             | -27 | 24  | 55     | 3.76            | *    |
|                                   | R          | 56              | -53 | 38  | 1013   | 4.11            | ***  |
| <i>Cerebellum</i>                 | L-R        | -6              | -59 | -9  | 943    | 4.01            | ***  |
|                                   | L          | -21             | -45 | -57 | 545    | 4.26            | *    |
|                                   | L          | -35             | -75 | -47 | 137    | 3.56            | *    |
| <i>Anterior Cingulate Cortex</i>  | L          | -9              | 35  | 20  | 90     | 4.02            | **   |
| <i>Posterior Cingulate Cortex</i> | L          | -12             | -36 | 50  | 104    | 3.96            | *    |
|                                   | R          | 15              | -38 | 54  | 130    | 4.33            | *    |
|                                   | L-R        | 3               | -60 | 27  | 88     | 3.50            | *    |
| <i>Temporal Parietal Junction</i> | L          | -53             | -62 | 21  | 169    | 4.53            | *    |
|                                   | R          | 62              | -57 | 14  | 92     | 3.57            | *    |
| <i>Superior Temporal Sulcus</i>   | L          | -63             | -42 | -2  | 379    | 4.22            | *    |
|                                   | R          | 71              | -23 | -2  | 258    | 3.65            | *    |
| <i>Visual Cortex</i>              | L          | -9              | -95 | -3  | 388    | 4.28            | *    |
|                                   | R          | 42              | -80 | 21  | 130    | 4.18            | *    |
|                                   | R          | 32              | -74 | 44  | 197    | 3.76            | *    |
| <i>Striatum</i>                   | R          | 11              | 20  | -8  | 192    | 3.93            | **   |
| <i>Middle Frontal Gyrus</i>       | R          | 29              | 60  | -9  | 112    | 3.92            | *    |
|                                   | R          | 29              | 59  | 5   | 73     | 3.85            | **   |
|                                   | R          | 32              | 56  | 23  | 57     | 3.48            | *    |
| <i>Anterior Insula</i>            | L          | -47             | 26  | -2  | 149    | 3.88            | *    |
| <i>Posterior Insula</i>           | L          | -45             | -3  | 9   | 175    | 3.53            | *    |
| <i>Parahippocampal Gyrus</i>      | L          | -36             | -23 | -27 | 203    | 3.85            | *    |
|                                   | R          | 36              | -27 | -18 | 97     | 3.72            | *    |
| <i>Medial Prefrontal Cortex</i>   | R          | 14              | 65  | 20  | 71     | 3.82            | *    |
| <i>Superior Frontal Gyrus</i>     | L          | -21             | 12  | 68  | 56     | 3.78            | *    |

|                                    |   |     |     |     |     |      |   |
|------------------------------------|---|-----|-----|-----|-----|------|---|
| <i>Medial Orbitofrontal Cortex</i> | L | -8  | 47  | -26 | 105 | 3.65 | * |
|                                    | R | 8   | 57  | -24 | 97  | 3.72 | * |
| <i>Anterior Temporal Lobe</i>      | L | -53 | -3  | -39 | 72  | 3.51 | * |
|                                    | R | 24  | 15  | -32 | 82  | 3.55 | * |
| <i>Precentral Gyrus</i>            | L | -54 | -18 | 53  | 50  | 3.53 | * |
|                                    | L | -41 | -20 | 60  | 71  | 3.5  | * |

\*  $p < .001$  uncorrected voxel-level, \*\*  $p < .05$  SVC cluster-level, \*\*\*  $p < .05$  FWE cluster-level

## Discussion

In a sample of high trait anxious individuals, we found that individual differences in attentional bias to threat correlated with regional differences in GMV. Consistent with previous research in unselected samples (Carlson, Beacher, et al., 2012), cluster-level FWE corrected ROI analyses suggest that greater GMV in the ACC, MFG, and basal forebrain/striatum are linked to elevated attentional bias to threat. Furthermore, in our high anxiety sample, whole brain FWE corrected analyses indicate that elevated attentional bias to threat is additionally associated with greater GMV in the rPPC and cerebellum. A number of additional regions displayed this same association at an uncorrected level (see **Table 2**). No regions showed the opposite (i.e., negative) association. In our exploratory analyses, we observed sex differences in distinction sub-regions of the rPPC. In a relatively more medial and dorsal cluster, there was a negative correlation between GMV and attentional bias in males, but not females. On the other hand, in a relatively more lateral and ventral cluster, there was a negative association between GMV and attentional bias in females, but not males (see **Supplementary Material** for more information). In sum, we present novel evidence that GMV in distributed brain regions such as the ACC, MFG, striatum, rPPC, and cerebellum (among other regions) is linked to attentional bias.

The associations between GMV and attentional bias to threat observed here builds on earlier research in unselected samples (Carlson, Beacher, et al., 2012). Consistent with this previous work, we found that greater GMV in the ACC, MFG, and basal forebrain/striatum was related to greater attentional bias to threat. Not only did this earlier research use an unselected sample, but also used a backward masking procedure to restrict the processing of the fearful face cues. Thus, our findings generalize the association between attentional bias to threat and GMV in the ACC (among other regions) to high anxiety individuals and unmasked threat signals afforded more elaborative processing. The ACC is thought to play a role in conflict monitoring and resolution (Botvinick, Cohen, & Carter, 2004; Botvinick, Nystrom, Fissell, Carter, & Cohen, 1999). In the context of attentional bias to threat, the ACC may detect conflict between the location of the threat-related stimulus and the goal-relevant target stimulus (i.e., incongruent trial types; Fu et al., 2015; Price et al., 2014). Indeed, conflict related ERPs (i.e., N2) are elicited in the dot-probe task (Andrzejewski & Carlson, 2020). When conflict is detected, the ACC and other PFC regions (e.g., MFG) may regulate the duration of attentional focus on the threat stimulus as well as the eventual disengagement and reengagement of attention to the goal-relevant target stimulus.

In addition to these previously implicated regions, novel associations between attentional bias to threat and GMV were observed in the rPPC and bilateral cerebellum. The rPPC is traditionally thought to play a role in spatial cognition including spatial attention (Culham & Kanwisher, 2001). It is part of a frontoparietal network involved in attentional control (Scolari, Seidl-Rathkopf, & Kastner, 2015). Interestingly, patients with lesions to the rPPC generally neglect (or fail to attend to) visual stimuli in the contralateral hemi-field, but do

not neglect emotional or threat-related stimuli in the contra-lateral hemi-field (Vuilleumier & Schwartz, 2001). Suggesting that the rPPC is involved in spatial attention, but is not necessary for emotional attention. Yet, although not necessary, structural variability in this structure appears to be linked to individual differences in attentional bias to threat in high anxiety individuals. In addition, the cerebellum has recently been implicated in anxiety-related symptoms and behaviors (Moreno-Rius, 2018). Cerebellar GMV differences and hyperactivity to threat-related stimuli have been observed in a variety of anxiety disorders (Moreno-Rius, 2018). Our results suggest that it is also involved in attentional bias to threat. Consistent with this notion, many cerebellar sub-regions are functional connected to the amygdala, ACC, PPC, and other regions involved in the allocation of spatial attention to threat (O'Reilly, Beckmann, Tomassini, Ramnani, & Johansen-Berg, 2010; Sang et al., 2012).

At an uncorrected threshold, we observed more widespread associations with attentional bias to threat with GMV in regions of the PFC, temporal lobes, and visual cortex. Many of these structures, including the ACC, insula, temporoparietal junction (TPJ), posterior superior temporal sulcus (pSTS), parietal cortex, and visual processing regions reveal patterns of intrinsic functional connectivity with the amygdala that are linked to attentional bias to threat and structural connectivity (Carlson et al., 2013). That is, greater amygdala connectivity in these regions has been linked to greater attentional biases to threat. However, consistent with previous research (Carlson, Beacher, et al., 2012), we did not find an association between amygdala GMV and attention bias. Evidence from animal models indicates that differences in VBM measures of GMV are linked to dendritic spine density (Keifer et al., 2015). Given that increased dendritic spine density is associated with fear learning and represents the capacity

for afferent signals into a structure, differences in GMV may reflect the connectivity or processing capacity of a region. If this is indeed true, it may explain why we do not see GMV differences in the amygdala. That is, differences in ACC, insula, TPJ, pSTS, parietal cortex, and visual cortical GMV may (at least in part) be due to the number of synapses from amygdala efferents. However, this hypothesis remains untested and future research is needed to assess its validity.

We included both traditional and newer measures of attentional bias. However, the newer TLBS measures of attentional bias did not correlate with GMV (at  $p < .001$ ,  $k > 50$ ). These null effects are likely reflective of similar, but weaker effects in these measures. Indeed, conjunction analysis indicates some overlap in GMV correlates between TLBS variability and the traditional measure of attentional bias (see **Supplementary Table 2**). In addition, the traditional attention bias > TLBS measures contrast in SPM did not reveal any significant differences. Indeed, attentional bias was moderately correlated with TLBS variability and TLBS Mean Positive, but all TLBS measures were highly correlated (see **Table 1**). Thus, TLBS measures are related to attentional bias, but appear to be more related to variability and this additional component may result in weaker associations with GMV.

Our results implicate a widespread network of regions where brain morphology is related to an anxiety-related symptom—attentional bias to threat. It should be emphasized that the direction of this relationship is unclear. That, is variability in regional GMV in this network may be an underlying risk factor for elevated attentional bias to threat, which has been shown to be a causal mechanism for the development of anxiety (MacLeod et al., 2002). Or, these GMV differences may be the consequence of this behavior. Future longitudinal

research will be needed to test these two possibilities. It has been hypothesized that tracking changes in GMV following anxiety reducing interventions such as ABM may be an effective way to gauge the success of the treatment in reorganizing the brain (Aday & Carlson, 2017). Indeed, recent research suggests that ABM produces structural changes in the brain (Abend et al., 2019). The regions identified in the current report (see **Table 2**) may be utilized as a priori ROIs for future studies assessing neuroplasticity in ABM. In addition, GMV in these regions could potentially be used to predict who is most likely to benefit from such treatments. That is, understanding how brain structure relates to attentional bias across individuals could be essential for understanding how ABM may induce neuroplasticity.

### **Limitations, Strengths, and Conclusions**

Like any study, this study had several strengths and weaknesses. A strength of our study is the relatively large sample size. However, this sample included more female than male participants and was comprised of primarily younger adults. Future research is needed to determine if the effects observed here generalize to younger and older age groups. In addition, given the well-established association between elevated anxiety and attentional bias to threat (Bar-Haim et al., 2007), we selected participants for heightened levels of attentional bias to threat and anxiety. On one hand, the composition of our sample is a strength as the relationship between GMV and attentional bias is highly relevant in neurocognitive models of anxiety. On the other hand, by selecting only individuals at the higher ends of each spectrum, we limited the range/variability of our measures, which precludes us from generalizing these findings to low anxiety individuals with low levels of attentional bias. Although it should be noted that many of our findings are consistent with earlier work using an unselected sample



(Carlson, Beacher, et al., 2012). Nevertheless, future research should explore the association tested here across a broader spectrum of anxiety levels.

In conclusion, we found that greater GMV in the ACC, MFG, and basal forebrain/striatum is linked to greater attentional bias to threat in high anxiety individuals, which replicates such associations in unselected samples (Carlson, Beacher, et al., 2012). We provide additional novel evidence that elevated attentional bias to threat in high trait anxious individuals is associated with greater GMV in the rPPC, cerebellum, and a number of other regions (see **Table 2**). Exploratory analyses provide initial evidence that distinct sub-regions of the rPPC may contribute to attentional bias to threat differently across the sexes (see **Supplementary Material**). Collectively, these findings add to our understanding of how differences in brain structure relate to attentional bias to threat in anxious individuals. Such knowledge may be informative for neurocognitive models of attentional bias in anxiety and for tracking neuroplasticity in interventions (e.g., ABM) for anxiety.

## Acknowledgements

Research reported in this publication was supported by the National Institute of Mental Health of the National Institutes of Health under Award Number R15MH110951. The content is solely the responsibility of the authors and does not necessarily represent the official views of the National Institutes of Health. We would like to thank Jeremy Andrzejewski, Taylor Susa, Katie Elwell, and all the other students in the Cognitive × Affective Behavior & Integrative Neuroscience (CABIN) Lab at Northern Michigan University as well as Rochelle Milano and Annette Gustafson at UPHS-Marquette for assisting in the collection of this data.

## **Disclosures**

### **Funding**

Research reported in this publication was supported by the National Institute of Mental Health of the National Institutes of Health under Award Number R15MH110951. The content is solely the responsibility of the authors and does not necessarily represent the official views of the National Institutes of Health.

### **Conflicts of interest/Competing interests**

Josh Carlson and Lin Fang report no conflict of interest.

### **Ethics approval**

The study was approved by the Northern Michigan University Institutional Review Board (HS13-555).

### **Consent to participate**

All participants provided written informed consent.

### **Consent for publication**

NA

### **Availability of data and material**

Data available upon request. Data will be available on the NIMH Data Archive 9/15/2021.

### **Code availability**

NA

### **Open Practice Statement**

The data will be available on the NIMH Data Archive 9/15/2021. The larger study from which this data comes from is registered at [clinicaltrials.gov](https://clinicaltrials.gov) under NCT03092609.

## References

- Abend, R., Rosenfelder, A., Shamai, D., Pine, D. S., Tavor, I., Assaf, Y., & Bar-Haim, Y. (2019). Brain structure changes induced by attention bias modification training. *Biol Psychol*, 146, 107736. doi:10.1016/j.biopsycho.2019.107736
- Aday, J. S., & Carlson, J. M. (2017). Structural MRI-based measures of neuroplasticity in an extended amygdala network as a target for attention bias modification treatment outcome. *Med Hypotheses*, 109, 6-16. doi:10.1016/j.mehy.2017.09.002
- Adolphs, R. (2004). Emotional vision. *Nat Neurosci*, 7(11), 1167-1168.
- Amaral, D. G., & Price, J. L. (1984). Amygdalo-Cortical Projections in the Monkey (Macaca-Fascicularis). *Journal of Comparative Neurology*, 230(4), 465-496.
- Anderson, A. K., & Phelps, E. A. (2001). Lesions of the human amygdala impair enhanced perception of emotionally salient events. *Nature*, 411(6835), 305-309.
- Andrzejewski, J. A., & Carlson, J. M. (2020). Electrocortical responses associated with attention bias to fearful facial expressions and auditory distress signals. *Int J Psychophysiol*, 151, 94-102. doi:10.1016/j.ijpsycho.2020.02.014
- Armony, J. L., & Dolan, R. J. (2002). Modulation of spatial attention by fear-conditioned stimuli: an event-related fMRI study. *Neuropsychologia*, 40(7), 817-826.
- Ashburner, J., & Friston, K. J. (2000). Voxel-based morphometry - The methods. *Neuroimage*, 11(6), 805-821. doi:Doi 10.1006/Nimg.2000.0582
- Bach, D. R., Hurlemann, R., & Dolan, R. J. (2014). Impaired threat prioritisation after selective bilateral amygdala lesions. *Cortex*, 63C, 206-213. doi:10.1016/j.cortex.2014.08.017

Bar-Haim, Y., Lamy, D., Pergamin, L., Bakermans-Kranenburg, M. J., & van Ijzendoorn, M. H.

(2007). Threat-related attentional bias in anxious and nonanxious individuals: a meta-analytic study. *Psychol Bull*, 133(1), 1-24. doi:10.1037/0033-2909.133.1.1

Beevers, C. G., Gibb, B. E., McGeary, J. E., & Miller, I. W. (2007). Serotonin transporter genetic variation and biased attention for emotional word stimuli among psychiatric inpatients.

*J Abnorm Psychol*, 116(1), 208-212. doi:2007-01891-020 [pii]

10.1037/0021-843X.116.1.208

Botvinick, M. M., Cohen, J. D., & Carter, C. S. (2004). Conflict monitoring and anterior cingulate cortex: an update. *Trends in cognitive sciences*, 8(12), 539-546. doi:Doi

10.1016/J.Tics.2004.10.003

Botvinick, M. M., Nystrom, L. E., Fissell, K., Carter, C. S., & Cohen, J. D. (1999). Conflict monitoring versus selection-for-action in anterior cingulate cortex. *Nature*, 402(6758), 179-181.

Britton, J. C., Suway, J. G., Clementi, M. A., Fox, N. A., Pine, D. S., & Bar-Haim, Y. (2015). Neural changes with attention bias modification for anxiety: a randomized trial. *Soc Cogn Affect Neurosci*, 10(7), 913-920. doi:10.1093/scan/nsu141

Browning, M., Holmes, E. A., Murphy, S. E., Goodwin, G. M., & Harmer, C. J. (2010). Lateral prefrontal cortex mediates the cognitive modification of attentional bias. *Biol*

*Psychiatry*, 67(10), 919-925. doi:10.1016/j.biopsych.2009.10.031

Bush, G., Luu, P., & Posner, M. I. (2000). Cognitive and emotional influences in anterior cingulate cortex. *Trends Cogn Sci*, 4(6), 215-222.

- Campbell, A., & Muncer, S. (2017). Sex difference in awareness of threat: A meta-analysis of sex differences in attentional orienting in the dot probe task. *Personality and Individual Differences, 119*, 181-184.
- Carlson, J. M., Aday, J. S., & Rubin, D. (2019). Temporal dynamics in attention bias: effects of sex differences, task timing parameters, and stimulus valence. *Cogn Emot, 33*(6), 1271-1276. doi:10.1080/02699931.2018.1536648
- Carlson, J. M., Beacher, F., Reinke, K. S., Habib, R., Harmon-Jones, E., Mujica-Parodi, L. R., & Hajcak, G. (2012). Nonconscious attention bias to threat is correlated with anterior cingulate cortex gray matter volume: A voxel-based morphometry result and replication. *Neuroimage, 59*(2), 1713-1718. doi:Doi 10.1016/J.Neuroimage.2011.09.040
- Carlson, J. M., Cha, J., Harmon-Jones, E., Mujica-Parodi, L. R., & Hajcak, G. (2014). Influence of the BDNF Genotype on Amygdalo-Prefrontal White Matter Microstructure is Linked to Nonconscious Attention Bias to Threat. *Cereb Cortex, 24*(9), 2249-2257. doi:10.1093/cercor/bht089
- Carlson, J. M., Cha, J., & Mujica-Parodi, L. R. (2013). Functional and structural amygdala - Anterior cingulate connectivity correlates with attentional bias to masked fearful faces. *Cortex, 49*(9), 2595-2600. doi:10.1016/j.cortex.2013.07.008
- Carlson, J. M., & Fang, L. (2020). The stability and reliability of attentional bias measures in the dot-probe task: Evidence from both traditional mean bias scores and trial-level bias scores. *Motivation and Emotion, 1-13*.

- Carlson, J. M., & Mujica-Parodi, L. R. (2015). Facilitated Attentional Orienting and Delayed Disengagement to Conscious and Nonconscious Fearful Faces. *Journal of Nonverbal Behavior*, 39(1), 69-77. doi:DOI 10.1007/s10919-014-0185-1
- Carlson, J. M., Mujica-Parodi, L. R., Harmon-Jones, E., & Hajcak, G. (2012). The Orienting of Spatial Attention to Backward Masked Fearful Faces Is Associated With Variation in the Serotonin Transporter Gene. *Emotion*, 12(2), 203-207.
- Carlson, J. M., & Reinke, K. S. (2008). Masked fearful faces modulate the orienting of covert spatial attention. *Emotion*, 8(4), 522-529. doi:2008-09984-008 [pii] 10.1037/a0012653
- Carlson, J. M., Reinke, K. S., & Habib, R. (2009). A left amygdala mediated network for rapid orienting to masked fearful faces. *Neuropsychologia*, 47(5), 1386-1389. doi:S0028-3932(09)00028-1 [pii] 10.1016/j.neuropsychologia.2009.01.026
- Culham, J. C., & Kanwisher, N. G. (2001). Neuroimaging of cognitive functions in human parietal cortex. *Curr Opin Neurobiol*, 11(2), 157-163. doi:10.1016/s0959-4388(00)00191-4
- Desimone, R., & Duncan, J. (1995). Neural mechanisms of selective visual attention. *Annu Rev Neurosci*, 18, 193-222. doi:10.1146/annurev.ne.18.030195.001205
- Fox, E. (2002). Processing emotional facial expressions: the role of anxiety and awareness. *Cogn Affect Behav Neurosci*, 2(1), 52-63.
- Fox, E., Ridgewell, A., & Ashwin, C. (2009). Looking on the bright side: biased attention and the human serotonin transporter gene. *Proc Biol Sci*, 276(1663), 1747-1751. doi:rsob.2008.1788 [pii]

10.1098/rspb.2008.1788

Fu, X., Taber-Thomas, B. C., & Perez-Edgar, K. (2015). Frontolimbic functioning during threat-related attention: Relations to early behavioral inhibition and anxiety in children. *Biol Psychol*. doi:10.1016/j.biopsycho.2015.08.010

Ge, Y., Grossman, R. I., Babb, J. S., Rabin, M. L., Mannon, L. J., & Kolson, D. L. (2002). Age-related total gray matter and white matter changes in normal adult brain. Part I: volumetric MR imaging analysis. *AJNR Am J Neuroradiol*, 23(8), 1327-1333.

Gur, R. C., Sara, R., Hagendoorn, M., Marom, O., Huggett, P., Macy, L., . . . Gur, R. E. (2002). A method for obtaining 3-dimensional facial expressions and its standardization for use in neurocognitive studies. *J Neurosci Methods*, 115(2), 137-143.

Hilland, E., Landro, N. I., Harmer, C. J., Browning, M., Maglanoc, L. A., & Jonassen, R. (2020). Attentional bias modification is associated with fMRI response toward negative stimuli in individuals with residual depression: a randomized controlled trial. *J Psychiatry Neurosci*, 45(1), 23-33. doi:10.1503/jpn.180118

Hilland, E., Landro, N. I., Harmer, C. J., Maglanoc, L. A., & Jonassen, R. (2018). Within-Network Connectivity in the Salience Network After Attention Bias Modification Training in Residual Depression: Report From a Preregistered Clinical Trial. *Front Hum Neurosci*, 12, 508. doi:10.3389/fnhum.2018.00508

Keifer, O. P., Jr., Hurt, R. C., Gutman, D. A., Keilholz, S. D., Gourley, S. L., & Ressler, K. J. (2015). Voxel-based morphometry predicts shifts in dendritic spine density and morphology with auditory fear conditioning. *Nat Commun*, 6, 7582. doi:10.1038/ncomms8582



Lundqvist, D., Flykt, A., & Öhman, A. (1998). The Karolinska directed emotional faces (KDEF). *CD ROM from Department of Clinical Neuroscience, Psychology section, Karolinska Institutet*, 91-630.

MacLeod, C., & Mathews, A. (1988). Anxiety and the allocation of attention to threat. *Q J Exp Psychol A*, 40(4), 653-670.

MacLeod, C., Rutherford, E., Campbell, L., Ebsworthy, G., & Holker, L. (2002). Selective attention and emotional vulnerability: assessing the causal basis of their association through the experimental manipulation of attentional bias. *J Abnorm Psychol*, 111(1), 107-123.

Mathews, A., & Mackintosh, B. (1998). A cognitive model of selective processing in anxiety. *Cognitive Therapy and Research*, 22(6), 539-560.

Mogg, K., & Bradley, B. P. (2002). Selective orienting of attention to masked threat faces in social anxiety. *Behav Res Ther*, 40(12), 1403-1414.

Monk, C. S., Telzer, E. H., Mogg, K., Bradley, B. P., Mai, X., Louro, H. M., . . . Pine, D. S. (2008). Amygdala and ventrolateral prefrontal cortex activation to masked angry faces in children and adolescents with generalized anxiety disorder. *Arch Gen Psychiatry*, 65(5), 568-576. doi:65/5/568 [pii]

10.1001/archpsyc.65.5.568

Moreno-Rius, J. (2018). The cerebellum in fear and anxiety-related disorders. *Prog Neuropsychopharmacol Biol Psychiatry*, 85, 23-32. doi:10.1016/j.pnpbp.2018.04.002

O'Reilly, J. X., Beckmann, C. F., Tomassini, V., Ramnani, N., & Johansen-Berg, H. (2010). Distinct and overlapping functional zones in the cerebellum defined by resting state functional connectivity. *Cereb Cortex*, 20(4), 953-965. doi:10.1093/cercor/bhp157

- Ohman, A., Flykt, A., & Esteves, F. (2001). Emotion drives attention: detecting the snake in the grass. *J Exp Psychol Gen*, 130(3), 466-478.
- Price, R. B., Siegle, G. J., Silk, J. S., Ladouceur, C. D., McFarland, A., Dahl, R. E., & Ryan, N. D. (2014). Looking under the hood of the dot-probe task: an fMRI study in anxious youth. *Depress Anxiety*, 31(3), 178-187. doi:10.1002/da.22255
- Sang, L., Qin, W., Liu, Y., Han, W., Zhang, Y., Jiang, T., & Yu, C. (2012). Resting-state functional connectivity of the vermal and hemispheric subregions of the cerebellum with both the cerebral cortical networks and subcortical structures. *Neuroimage*, 61(4), 1213-1225. doi:10.1016/j.neuroimage.2012.04.011
- Scolari, M., Seidl-Rathkopf, K. N., & Kastner, S. (2015). Functions of the human frontoparietal attention network: Evidence from neuroimaging. *Curr Opin Behav Sci*, 1, 32-39. doi:10.1016/j.cobeha.2014.08.003
- Spielberger, C. D., Gorsuch, R. L., & Lushene, R. E. (1970). *Manual for the State-Trait Anxiety Inventory (Self- Evaluation Questionnaire)*. Palo Alto, CA: Consulting Psychology Press.
- Taylor, C. T., Aupperle, R. L., Flagan, T., Simmons, A. N., Amir, N., Stein, M. B., & Paulus, M. P. (2014). Neural correlates of a computerized attention modification program in anxious subjects. *Soc Cogn Affect Neurosci*, 9(9), 1379-1387. doi:10.1093/scan/nst128
- Tisserand, D. J., van Boxtel, M. P., Pruessner, J. C., Hofman, P., Evans, A. C., & Jolles, J. (2004). A voxel-based morphometric study to determine individual differences in gray matter density associated with age and cognitive change over time. *Cereb Cortex*, 14(9), 966-973. doi:10.1093/cercor/bhh057

Torrence, R. D., Wylie, E., & Carlson, J. M. (2017). The time-course for the capture and hold of visuospatial attention by fearful and happy faces. *Journal of Nonverbal Behavior*.

doi:doi:10.1007/s10919-016-0247-7

Vuilleumier, P. (2005). How brains beware: neural mechanisms of emotional attention. *Trends Cogn Sci*, 9(12), 585-594.

Vuilleumier, P., Richardson, M. P., Armony, J. L., Driver, J., & Dolan, R. J. (2004). Distant influences of amygdala lesion on visual cortical activation during emotional face processing. *Nat Neurosci*, 7(11), 1271-1278.

Vuilleumier, P., & Schwartz, S. (2001). Beware and be aware: capture of spatial attention by fear-related stimuli in neglect. *Neuroreport*, 12(6), 1119-1122.

White, L. K., Britton, J. C., Sequeira, S., Ronkin, E. G., Chen, G., Bar-Haim, Y., . . . Pine, D. S. (2016). Behavioral and neural stability of attention bias to threat in healthy adolescents. *Neuroimage*, 136, 84-93. doi:10.1016/j.neuroimage.2016.04.058

Zvielli, A., Bernstein, A., & Koster, E. H. (2015). Temporal Dynamics of Attentional Bias. *Clinical Psychological Science*, 3(5), 772-788.
